# Supplementary material for: Iron oxide nanoparticles trigger endoplasmic reticulum damage in steatotic hepatic cells
Source: Royal Society of Chemistry journal article supplement (doi:10.1039/d3na00071k), 2023-01-01

## Supplementary Material

### **Iron oxide nanoparticles trigger endoplasmic reticulum damage in steatotic hepatic cells**

*Mariia Uzhytchak<sup>a,¶</sup>, Mariia Lunova<sup>a,b,¶</sup>, Barbora Smolková<sup>a</sup>, Milan Jirsa<sup>b</sup>, Alexandr Dejneka<sup>a,\*</sup>, and Oleg Lunov<sup>a,\*</sup>*

<sup>a</sup> Department of Optical and Biophysical Systems, Institute of Physics of the Czech Academy of Sciences, Prague, 18221, Czech Republic

<sup>b</sup> Institute for Clinical & Experimental Medicine (IKEM), Prague, 14021, Czech Republic

<sup>¶</sup>M.U. and M.L. contributed equally to this work.

\* Email: [dejneka@fzu.cz](mailto:dejneka@fzu.cz); \*Email: [lunov@fzu.cz](mailto:lunov@fzu.cz)

**Table S1.** List of chemical probes used in the study.

| <b>Reagent</b>                                      | <b>Manufacturer</b>      | <b>Catalogue No</b> |
|-----------------------------------------------------|--------------------------|---------------------|
| PBS                                                 | Gibco                    | 10010015            |
| Minimum Essential Medium Eagle                      | BioConcept               | 1-31S01-I           |
| Glutamine                                           | Serana Europe            | RGL-001-100ML       |
| Triton-X100                                         | PanReac AppliChem        | A4975,0100          |
| Micro BCA Protein Assay Kit                         | Thermo Fisher Scientific | 23235               |
| RIPA buffer                                         | Millipore                | 20188               |
| Protease Inhibitor Cocktail                         | Sigma Aldrich            | P8340-1ML           |
| Phosphatase Inhibitor Cocktail 3                    | Sigma Aldrich            | P0044-1ML           |
| Paraformaldehyde                                    | VWR                      | 100503-917          |
| BSA                                                 | Sigma Aldrich            | 2153                |
| Blotting-Grade Blocker                              | Bio-Rad                  | 170-6404            |
| Clarity Max ECL Western Blotting Substrate          | Bio-Rad                  | 1705062             |
| Ethanol                                             | Sigma Aldrich            | 1.07017             |
| Fetal Bovine Serum                                  | Gibco                    | 10270-106           |
| Penicilin/Streptomycin                              | Biosera                  | XC-A4122/100        |
| Oil Red O                                           | Sigma Aldrich            | O0625               |
| Hematoxylin                                         | DiaPath                  | C0302               |
| Oleic acid                                          | Sigma Aldrich            | O1383               |
| Palmitic acid                                       | Sigma Aldrich            | P0500               |
| Iron oxide nanoparticles fluidMAG-CMX (200 nm)      | Chemicell GmbH           | 4106-5              |
| NE-PER™ Nuclear and Cytoplasmic Extraction Reagents | Thermo Fisher Scientific | 78833               |
| Thapsigargin                                        | Sigma Aldrich            | T9033               |
| Camptothecin                                        | Sigma Aldrich            | C9911               |

**Table S2.** List of fluorescent probes used in the study.

| <b>Probe/Kit</b>                                | <b>Manufacturer</b>      | <b>Catalogue No</b> |
|-------------------------------------------------|--------------------------|---------------------|
| Hoechst 33342                                   | Thermo Fisher Scientific | 62249               |
| alamarBlue™ Cell Viability Reagent              | Thermo Fisher Scientific | DAL1025             |
| ROS/Superoxide Detection Assay Kit              | Abcam                    | ab139476            |
| BODIPY™ 581/591 C11 (Lipid Peroxidation Sensor) | Thermo Fisher            | D3861               |

|                                                                          |                          |          |
|--------------------------------------------------------------------------|--------------------------|----------|
|                                                                          | Scientific               |          |
| Acridine Orange                                                          | Thermo Fisher Scientific | A3568    |
| LipidSpot™ 610 Lipid Droplet Stains                                      | Biotium                  | #70069   |
| LipidSpot™ 488 Lipid Droplet Stains                                      | Biotium                  | #70065   |
| LysoTracker™ Green DND-26                                                | Thermo Fisher Scientific | L7526    |
| LysoTracker™ Red DND-99                                                  | Thermo Fisher Scientific | L7528    |
| MitoTracker™ Red CMXRos                                                  | Thermo Fisher Scientific | M7512    |
| ER-Tracker™ Red                                                          | Thermo Fisher Scientific | E34250   |
| Dead Cell Apoptosis Kit (Annexin V Alexa Fluor 488 and Propidium Iodide) | Thermo Fisher Scientific | V13245   |
| thioflavin T                                                             | Abcam                    | ab120751 |
| JC-1                                                                     | Thermo Fisher Scientific | T3168    |

**Table S3.** List of antibodies used in the study.

| Antibody                                     | Clone/catalogue No | Dilution |        | Manufacturer              |
|----------------------------------------------|--------------------|----------|--------|---------------------------|
|                                              |                    | WB       | IF     |                           |
| Anti-NF- $\kappa$ B p65 antibody             | ab16502            | 1:2000   | N.A.   | Abcam                     |
| Anti-HDAC2                                   | 2540               | 1:1000   | N.A.   | Cell Signaling Technology |
| Anti- $\beta$ -actin                         | 10D10              | 1:1000   | N.A.   | Thermo Fisher Scientific  |
| Anti-BiP                                     | C50B12             | 1:1000   | N.A.   | Cell Signaling Technology |
| Anti-CHOP                                    | L63F7              | 1:1000   | N.A.   | Cell Signaling Technology |
| Anti- mouse-HRP                              | 1858413            | 1:10 000 | N.A.   | Pierce Biotechnology      |
| Anti-rabbit- HRP                             | 1858415            | 1:10 000 | N.A.   | Pierce Biotechnology      |
| Anti-LAMP1                                   | D4O1S/15665        | N.A.     | 1:100  | Cell Signaling Technology |
| Anti-Cathepsin B                             | D1C7Y/31718        | N.A.     | 1:100  | Cell Signaling Technology |
| AlexaFluor 488 goat anti-rabbit antibody IgG | A-11008            | N.A.     | 1:1000 | Thermo Fisher Scientific  |

|                                     |         |      |        |                          |
|-------------------------------------|---------|------|--------|--------------------------|
| AlexaFluor 568 goat anti-rabbit IgG | A-11011 | N.A. | 1:1000 | Thermo Fisher Scientific |
|-------------------------------------|---------|------|--------|--------------------------|

N.A. – not applicable; WB – western blot; IF – immunofluorescence.

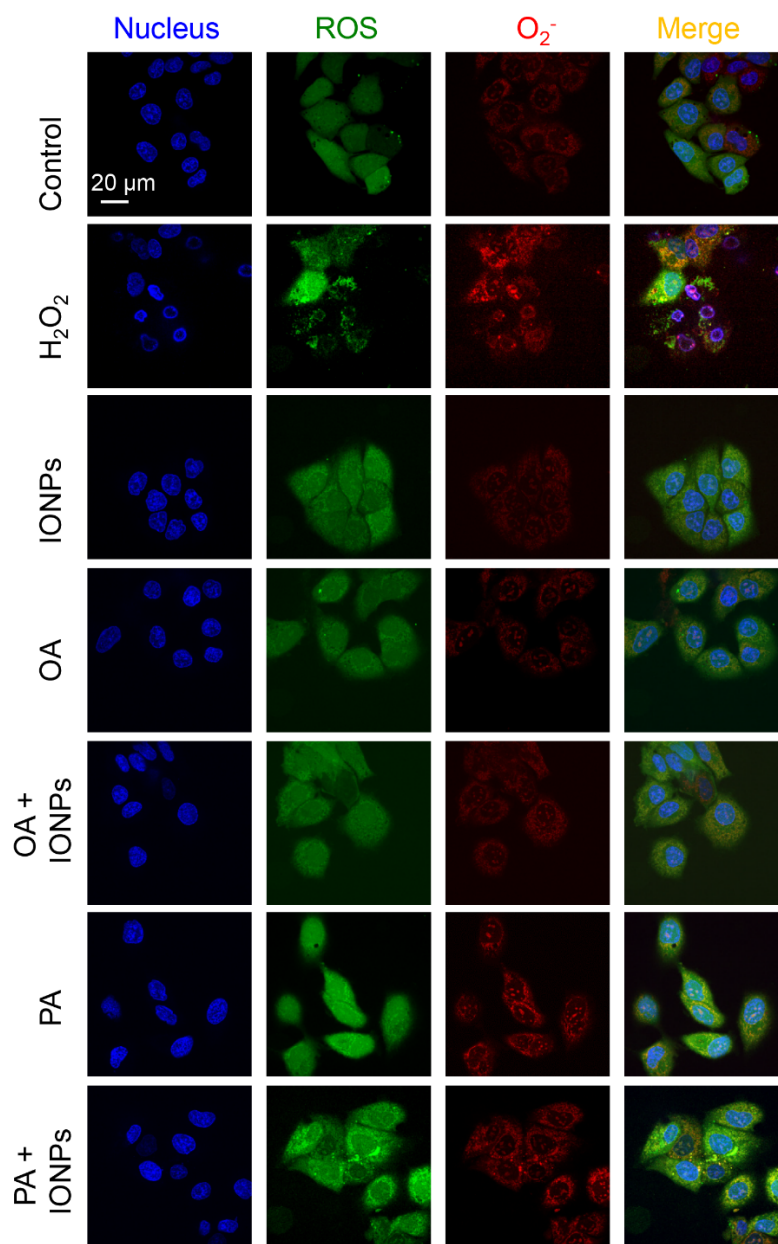

**Figure S1.** Analysis of ROS induction in hepatic cell lines upon co-treatment with IONPs and fatty acids. Alexander cells were co-treated with IONPs (50 μg/ml) and either OA or PA (20 μM) in accordance with scheme Figure 1b. Treated cells were stained with ROS/Superoxide Detection Assay Kit (Abcam, Cambridge, United Kingdom) and imaged by confocal microscopy. Representative images out of three independent experiments are shown. Positive control 100 μM H<sub>2</sub>O<sub>2</sub> for 30 min was used.

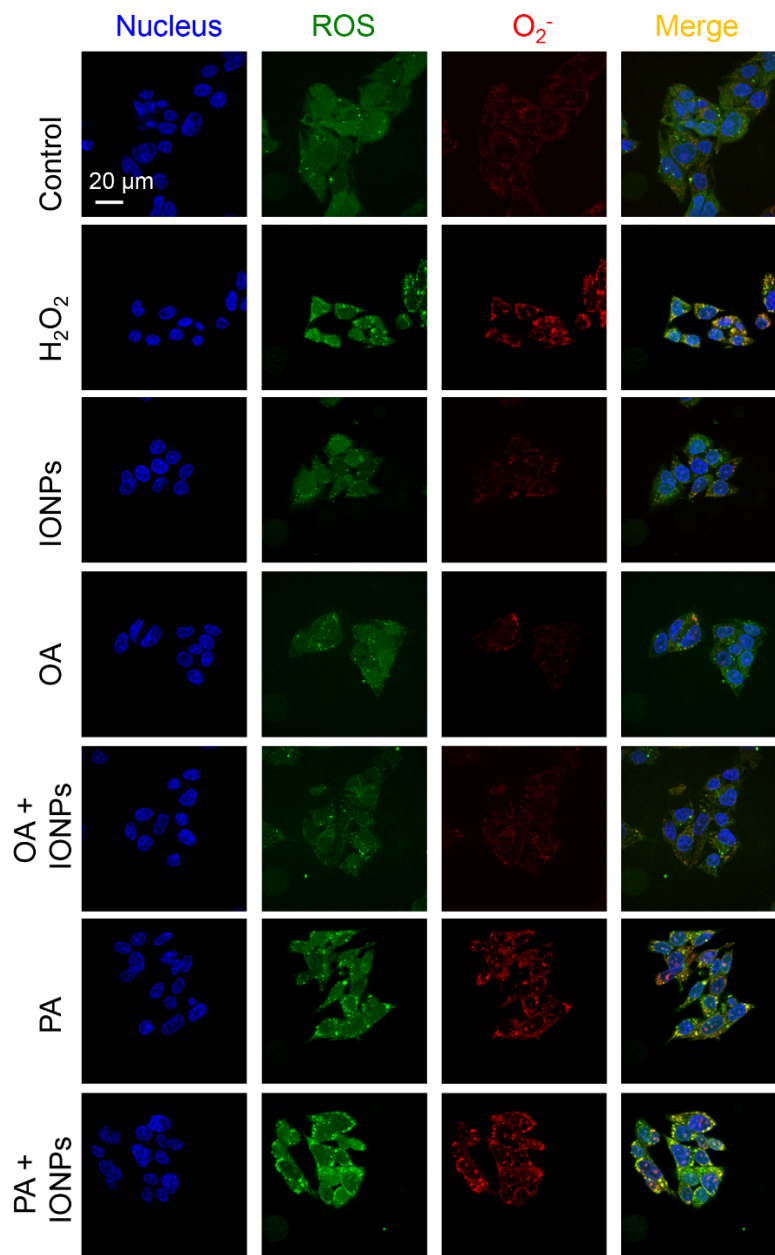

**Figure S2.** Analysis of ROS induction in hepatic cell lines upon co-treatment with IONPs and fatty acids. HepG2 cells were co-treated with IONPs (50 μg/ml) and either OA or PA (200 μM) in accordance with scheme Figure 1b. Treated cells were stained with ROS/Superoxide Detection Assay Kit (Abcam, Cambridge, United Kingdom) and imaged by confocal microscopy. Representative images out of three independent experiments are shown. Positive control 100 μM H<sub>2</sub>O<sub>2</sub> for 30 min was used.

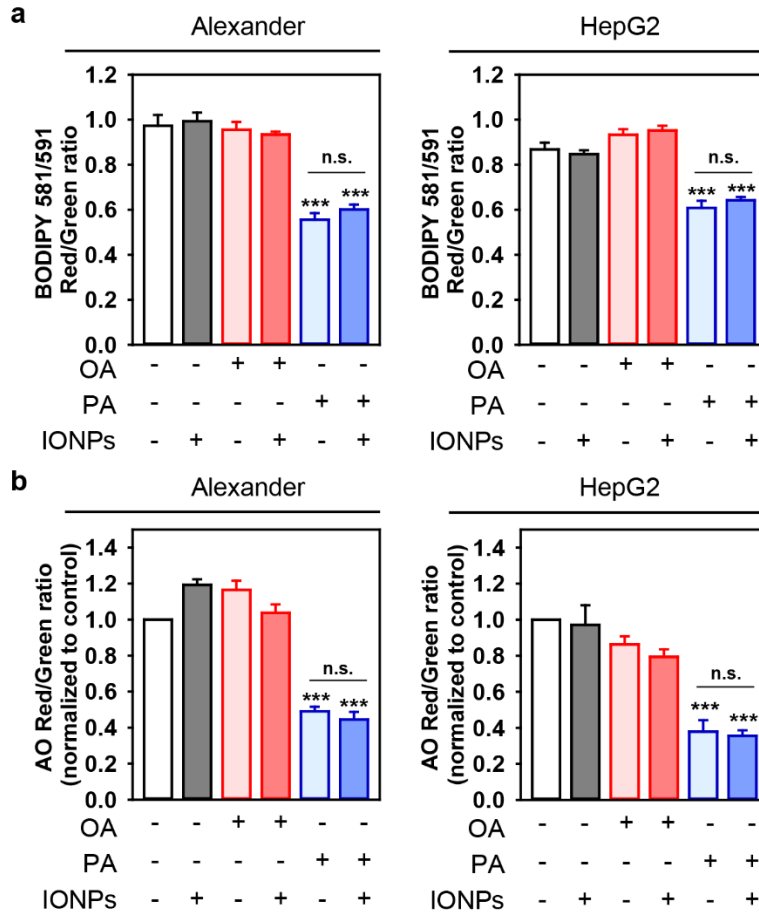

**Figure S3.** Analysis of lipid peroxidation (a) and lysosomal integrity (b) in hepatic cell lines upon co-treatment with IONPs and fatty acids. Alexander or HepG2 cells were co-treated with IONPs (50  $\mu\text{g/ml}$ ) and either OA or PA (20  $\mu\text{M}$  for Alexander and 200  $\mu\text{M}$  for HepG2 cells) in accordance with scheme Figure 1b. (a) Detection of lipid peroxidation using BODIPY<sup>TM</sup> 581/591 C11 lipid peroxidation sensor (ThermoFisher Scientific). Quantification of the lipid peroxidation ratio (red/green) was measured using a Tecan microplate reader SpectraFluor Plus (Tecan, Männedorf, Switzerland). Data are expressed as means  $\pm$  SEM ( $n = 3$ ). (\*\*\*)  $P < 0.001$  denotes significant differences. (b) Lysosomal integrity as measured by acridine orange (AO) red/green ratio fluorescence decrease. Cells were treated in accordance with scheme Figure 1b. stained with AO and then red and green AO fluorescence intensities were measured using a fluorescent microplate

reader. The data are expressed as mean  $\pm$  SEM,  $n = 3$  each. (\*\*\*)  $P < 0.001$  denotes significant differences.

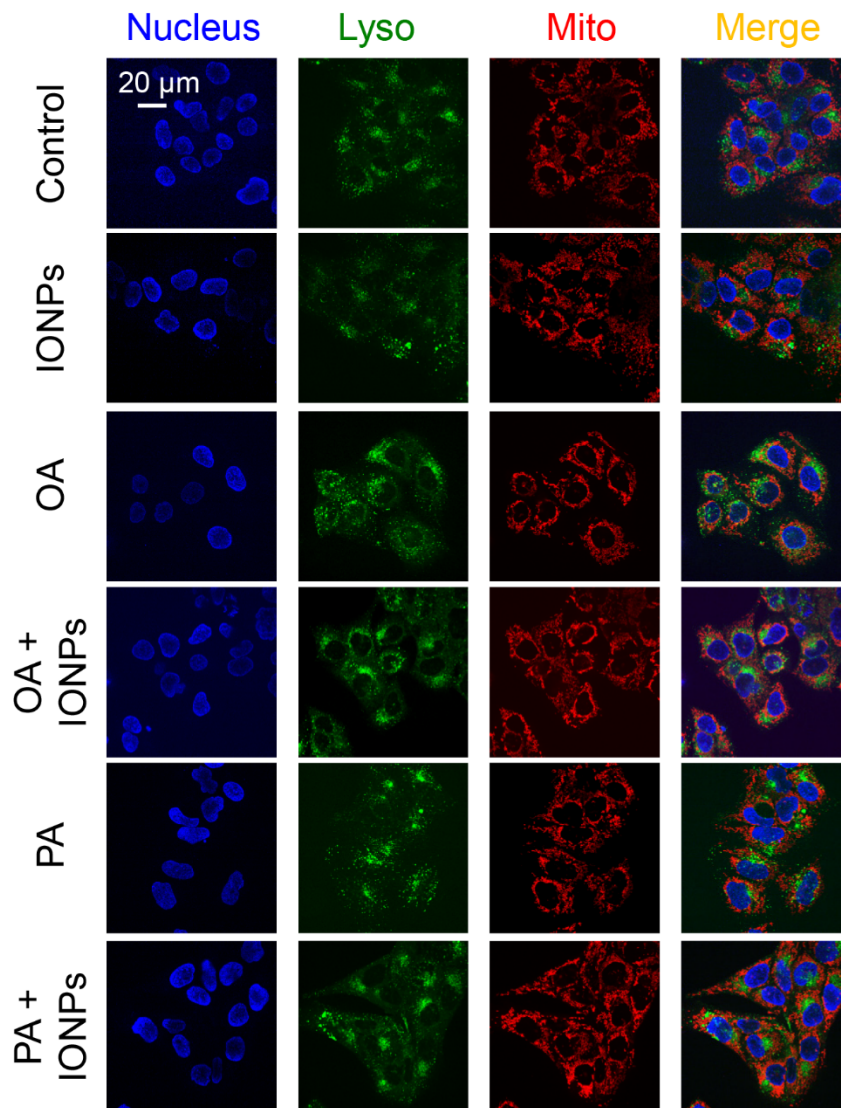

**Figure S4.** Effect of co-treatment with IONPs and fatty acids on morphology of lysosomes and mitochondria in Alexander cells. (a) Alexander cells were co-treated with IONPs (50  $\mu\text{g}/\text{ml}$ ) and either OA or PA (20  $\mu\text{M}$ ) in accordance with scheme Figure 1b. Cells were labeled with LysoTracker™ Green DND-26 (green) and MitoTracker™ Red CMXRos (red). Nuclei were



stained with hoechst 33342 nuclear stain (blue). Labeled cells were then imaged using spinning disk confocal microscopy.

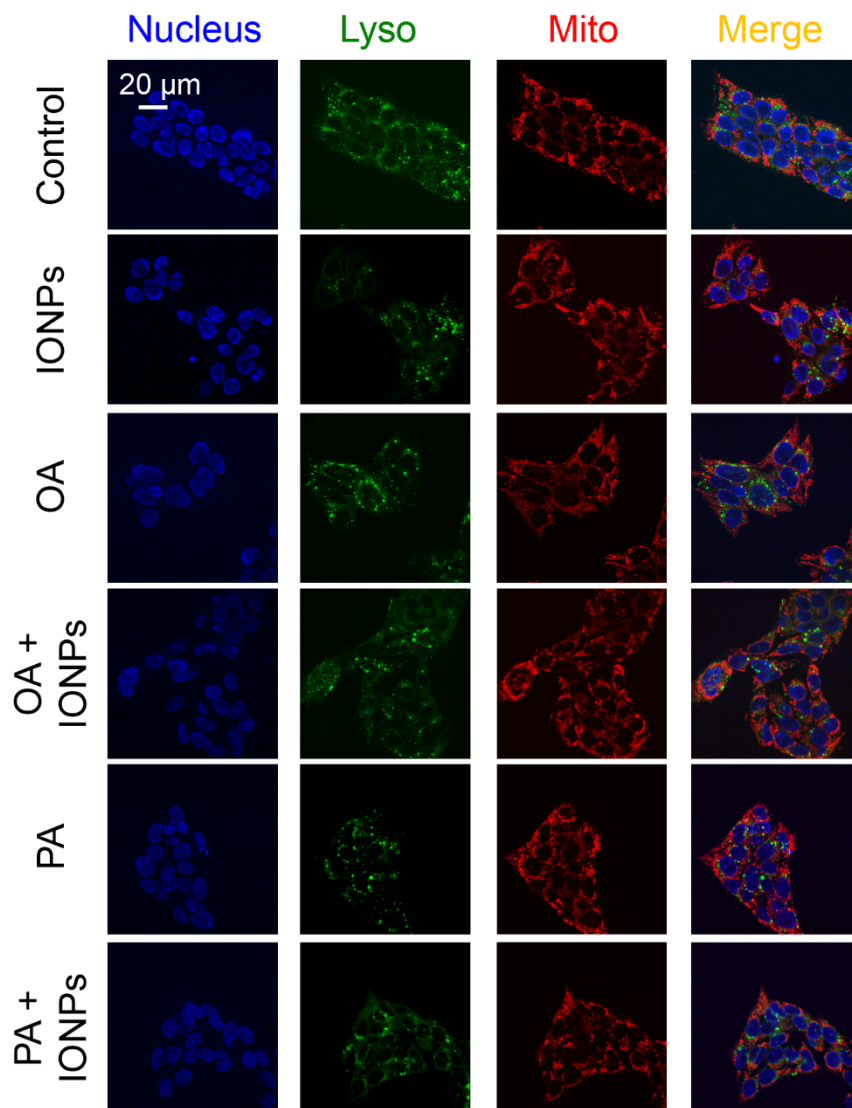

**Figure S5.** Effect of co-treatment with IONPs and fatty acids on morphology of lysosomes and mitochondria in HepG2 cells. (a) HepG2 cells were co-treated with IONPs (50 μg/ml) and either OA or PA (200 μM) in accordance with scheme Figure 1b. Cells were labeled with LysoTracker™ Green DND-26 (green) and MitoTracker™ Red CMXRos (red). Nuclei were stained with hoechst

33342 nuclear stain (blue). Labeled cells were then imaged using spinning disk confocal microscopy.

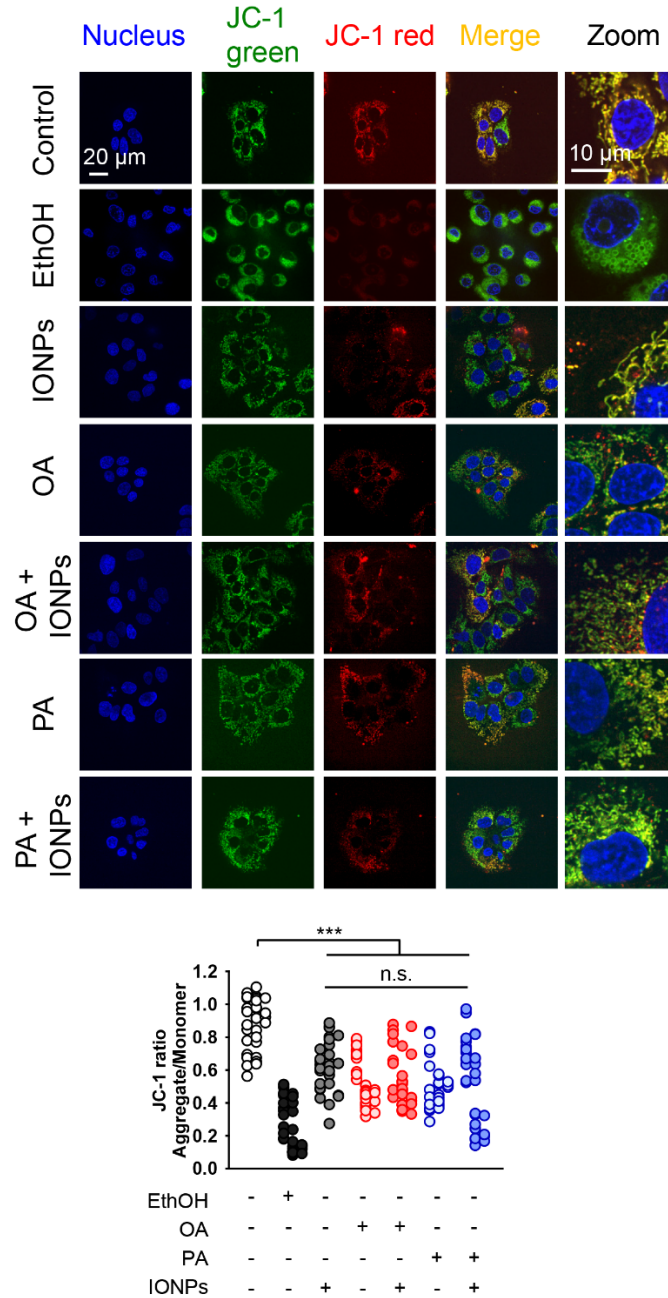

**Figure S6.** Assessment of mitochondrial membrane depolarization upon co-treatment with IONPs and fatty acids on morphology of lysosomes and mitochondria in Alexander cells. Alexander cells were co-treated with IONPs (50  $\mu\text{g}/\text{ml}$ ) and either OA or PA (20  $\mu\text{M}$ ) in accordance with scheme

Figure 1b. Cells were stained with JC-1 (1  $\mu$ M) and then imaged using spinning disk confocal microscopy. Nuclei were stained with hoechst 33342 nuclear stain (blue). Positive control – 20 % ethanol for 30 min. Confocal images were quantified using ImageJ software. Red/green JC-1 ratio was measured. Quantifications are presented as means of n = 30 cells. (\*\*\*)  $P < 0.001$  denotes significant differences.

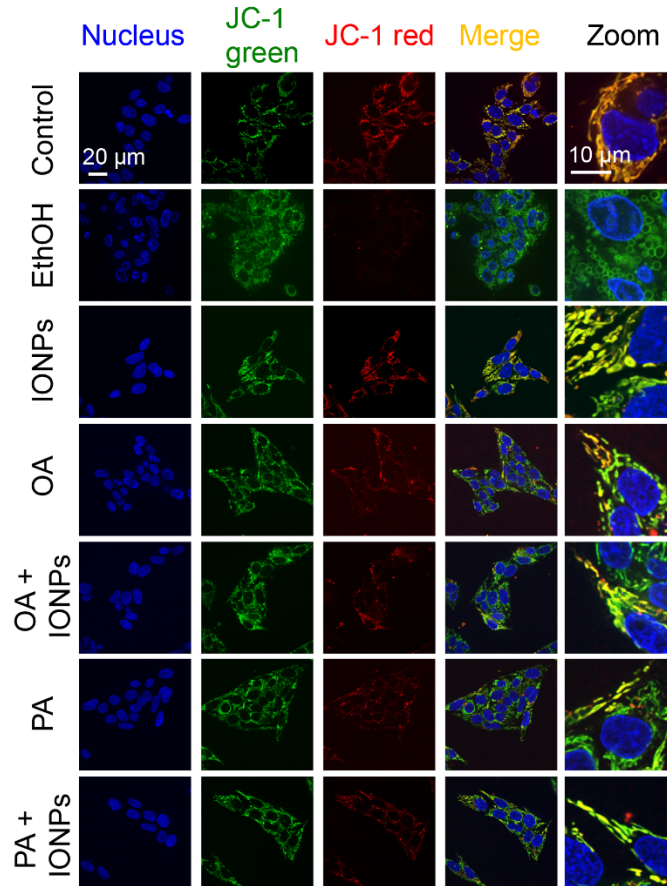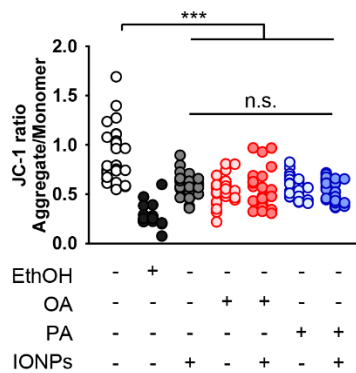

**Figure S7.** Assessment of mitochondrial membrane depolarization upon co-treatment with IONPs and fatty acids on morphology of lysosomes and mitochondria in HepG2 cells. HepG2 cells were co-treated with IONPs (50  $\mu\text{g}/\text{ml}$ ) and either OA or PA (200  $\mu\text{M}$ ) in accordance with scheme Figure 1b. Cells were stained with JC-1 (1  $\mu\text{M}$ ) and then imaged using spinning disk confocal microscopy. Nuclei were stained with hoechst 33342 nuclear stain (blue). Positive control – 20 % ethanol for 30 min. Confocal images were quantified using ImageJ software. Red/green JC-1 ratio was measured. Quantifications are presented as means of  $n = 30$  cells. (\*\*\*)  $P < 0.001$  denotes significant differences.

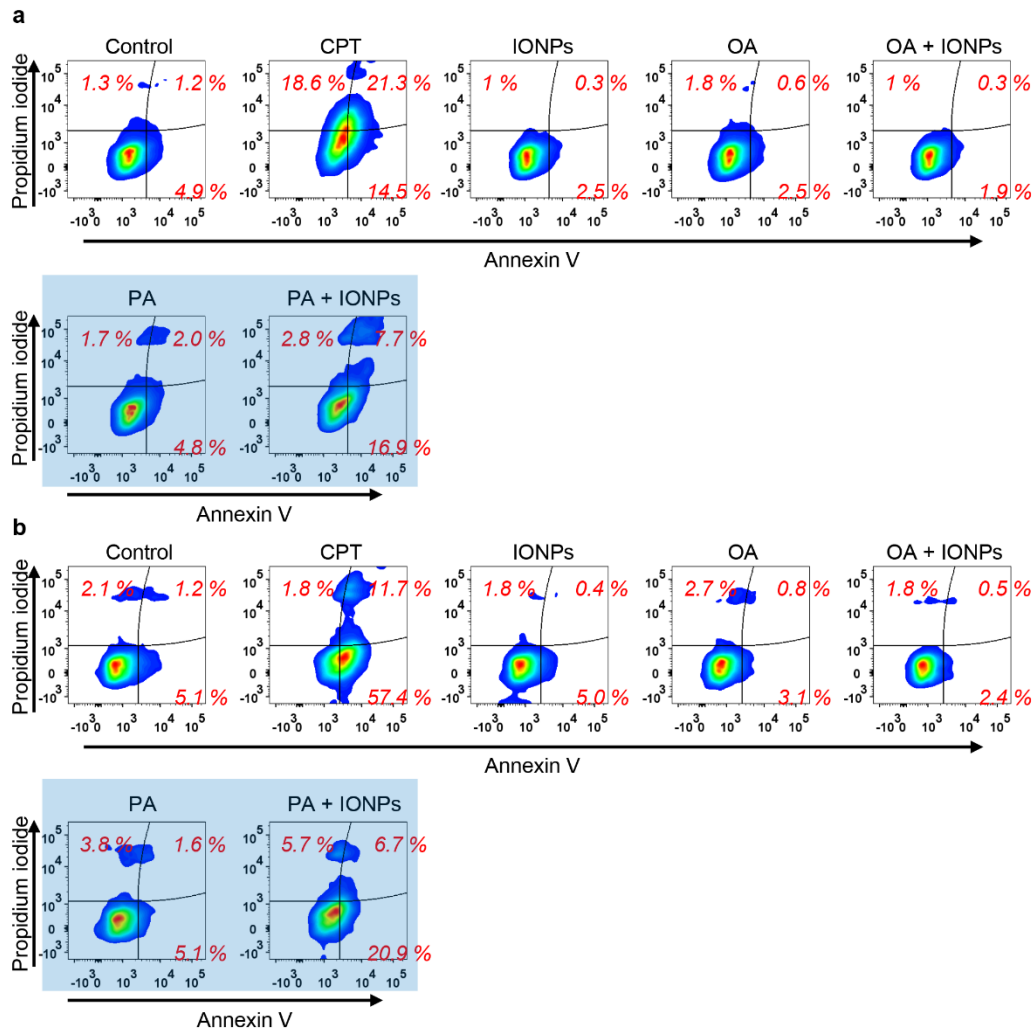

**Figure S8.** Alexander (a) or HepG2 (b) cells were co-treated with IONPs (50  $\mu\text{g}/\text{ml}$ ) and either OA or PA (20  $\mu\text{M}$  for Alexander and 200  $\mu\text{M}$  for HepG2 cells) in accordance with scheme Figure 1b. After treatment cells were labelled with annexin V, and propidium iodide (PI). Labelled cells were analyzed by flow cytometry. As a positive control, cells were treated with camptothecin (CPT) 30  $\mu\text{M}$  for 24 h. Representative flow charts out of three independent experiments are shown.

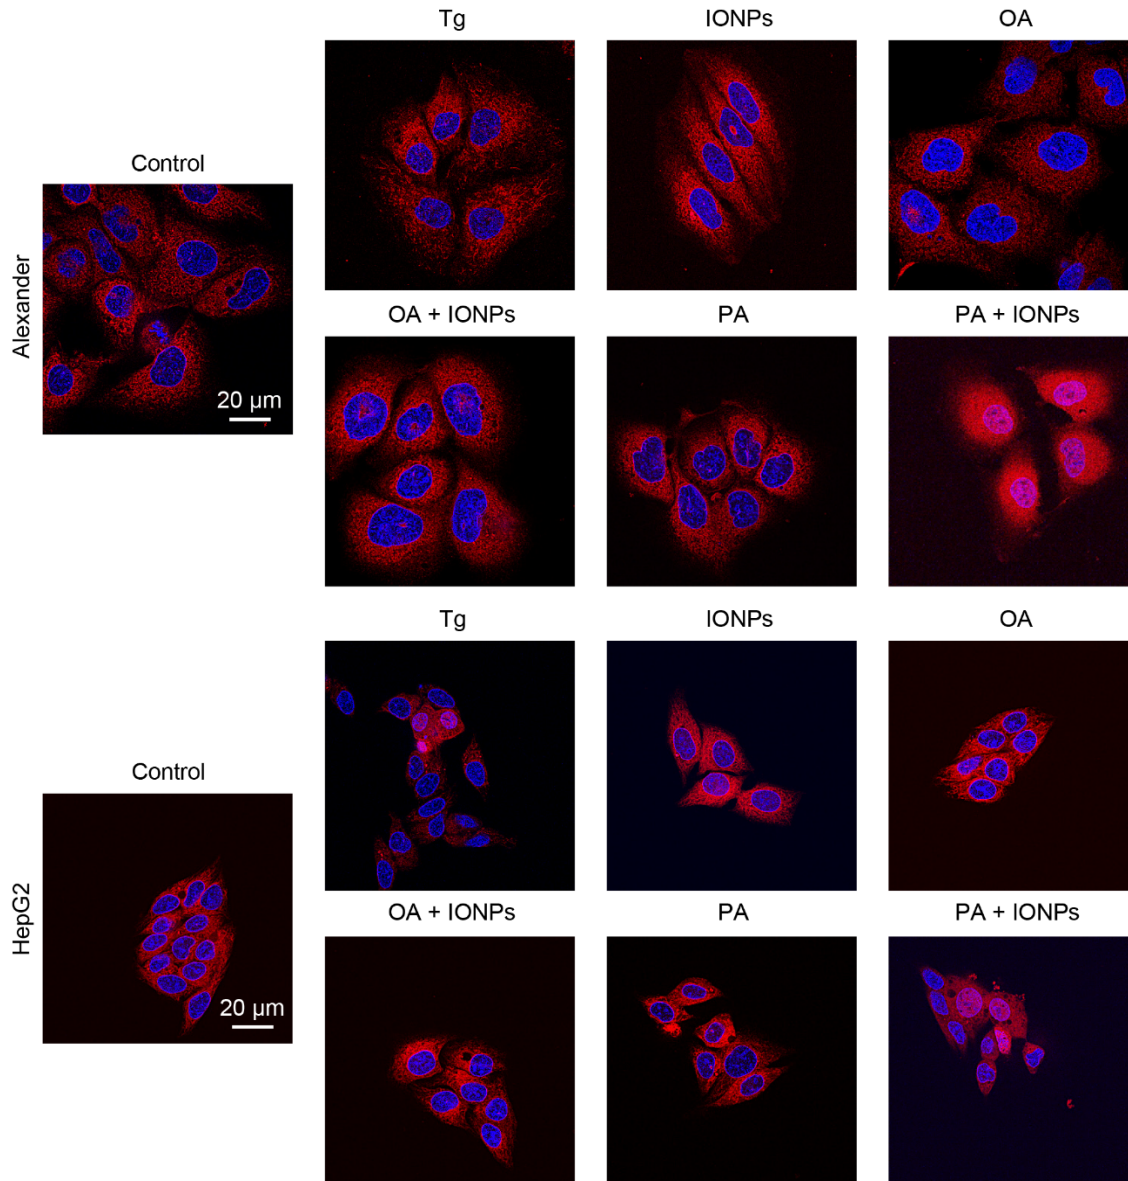

**Figure S9.** Cells were stained with ER-Tracker Red and visualized by confocal microscopy. Nuclei were stained with hoechst 33342 nuclear stain (blue). Positive control – treatment with s

thapsigargin (Tg) 1  $\mu$ M for 12 h. Stained cells were imaged using spinning disk confocal microscopy IXplore SpinSR (Olympus, Tokyo, Japan). Images were deconvolved using CellSens software (Olympus, Japan).

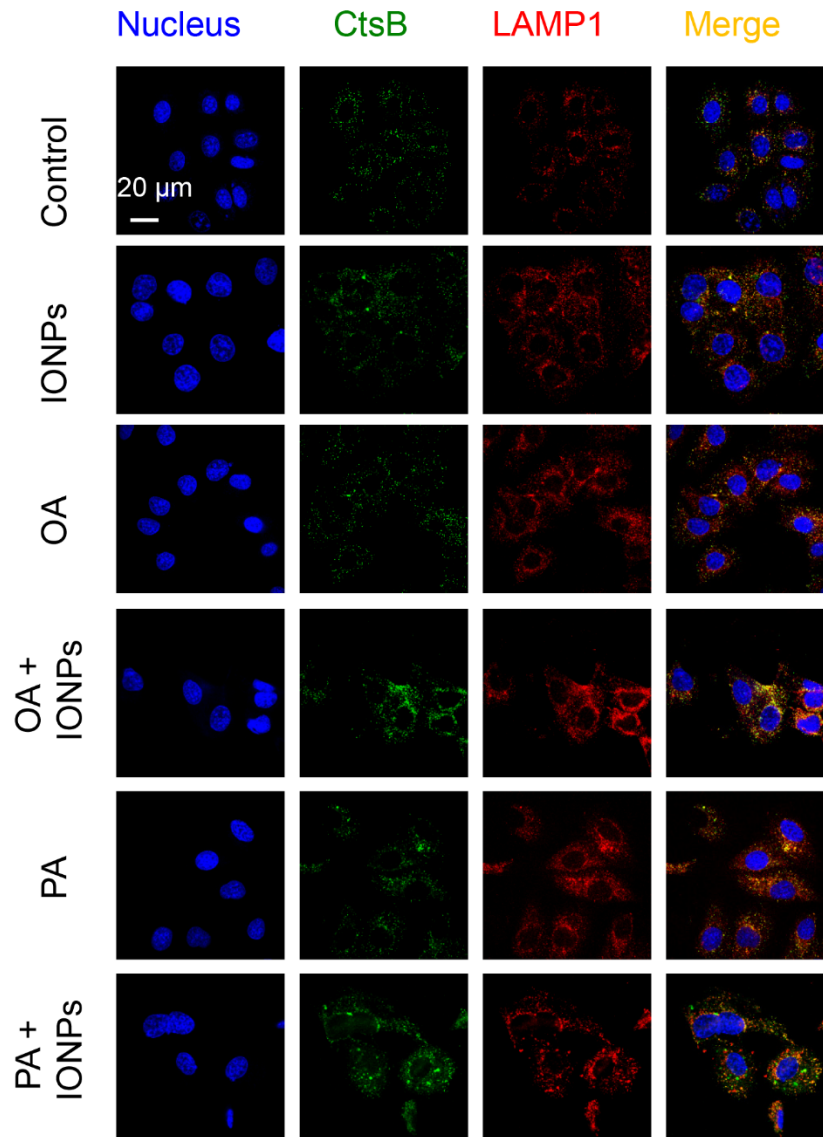

**Figure S10.** Alexander cells were co-treated with IONPs (50  $\mu$ g/ml) and either OA or PA (20  $\mu$ M) in accordance with scheme Figure 1b. After cells were fixed, permeabilized and immunostained with anti-CtsB (green) and anti-LAMP1 (red) antibodies. Nuclei were stained with hoechst 33342

nuclear stain (blue). Stained cells were imaged using spinning disk confocal microscopy IXplore SpinSR (Olympus, Tokyo, Japan).

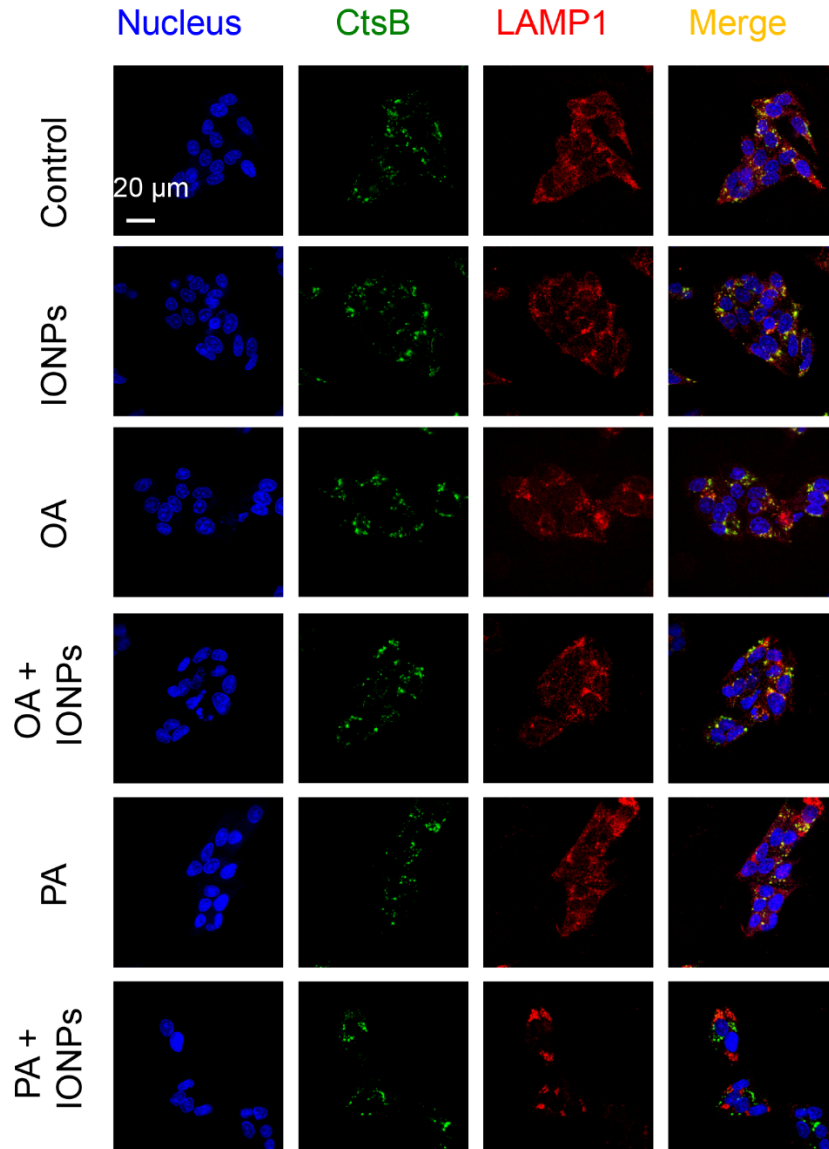

**Figure S11.** HepG2 cells were co-treated with IONPs (50 μg/ml) and either OA or PA (200 μM) in accordance with scheme Figure 1b. After cells were fixed, permeabilized and immunostained with anti-CtsB (green) and anti-LAMP1 (red) antibodies. Nuclei were stained with hoechst 33342 nuclear stain (blue). Stained cells were imaged using spinning disk confocal microscopy IXplore SpinSR (Olympus, Tokyo, Japan).

Uncropped immunoblot scans

Figure 6B

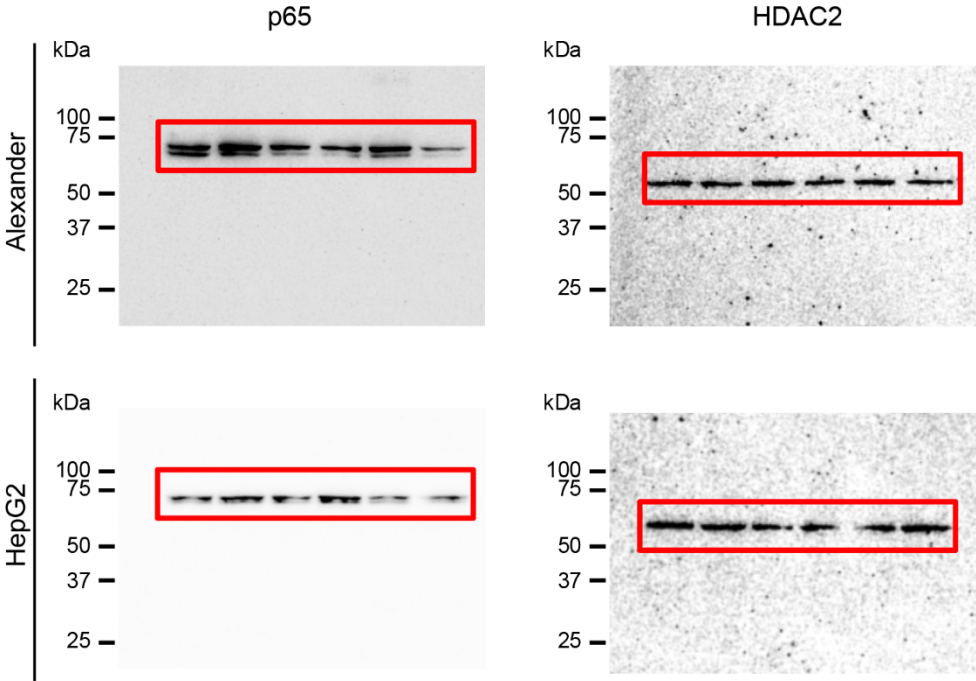



Figure 6C

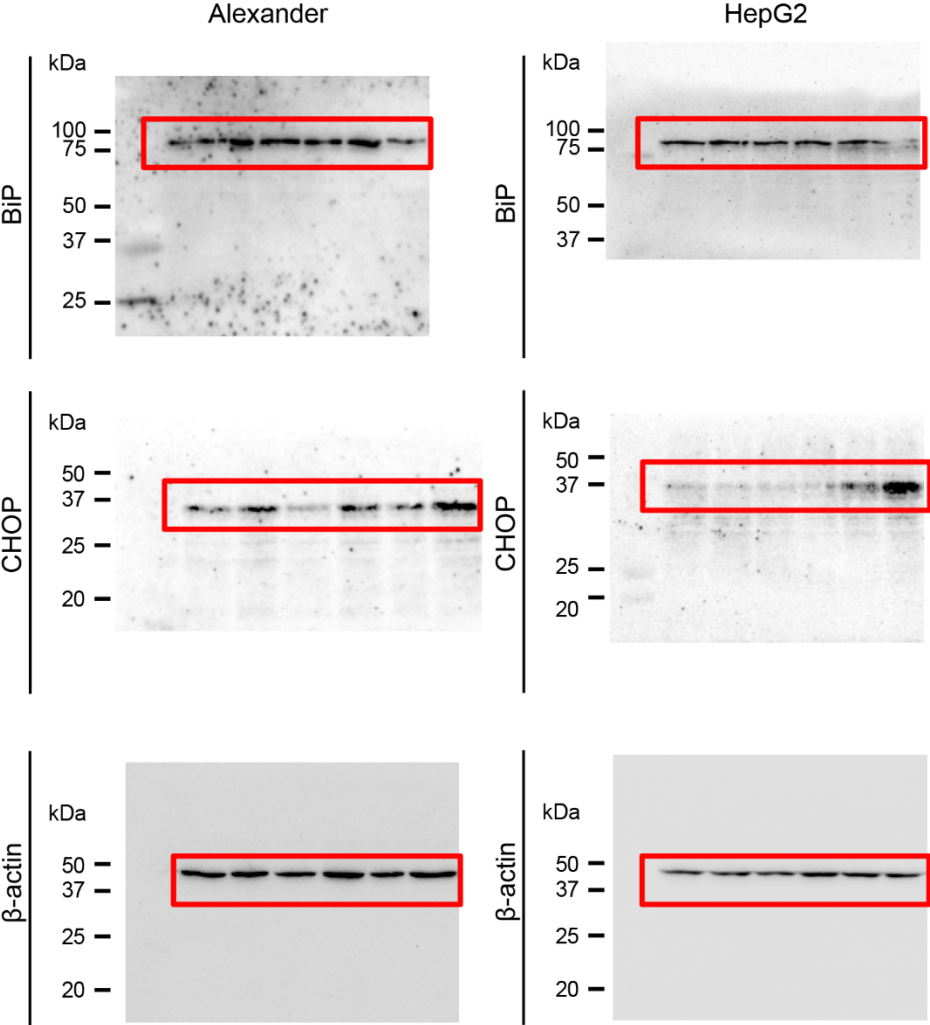

**Figure 6D**

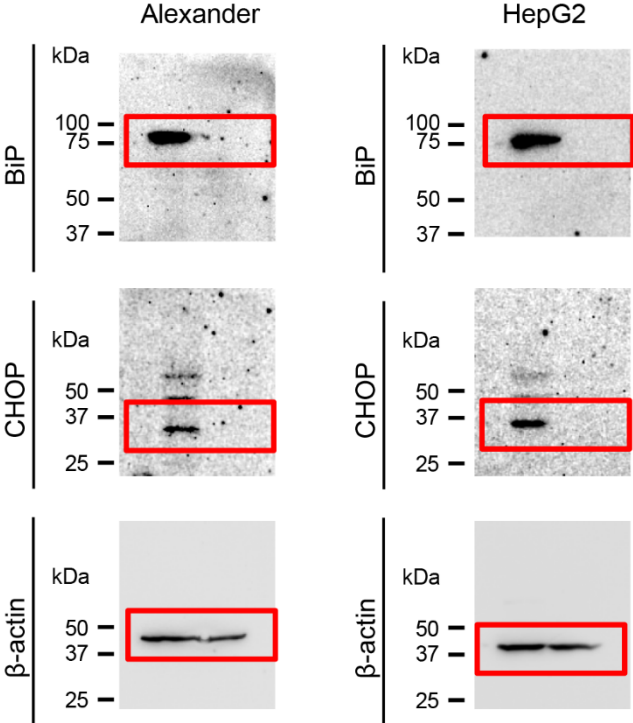

Supplement: d3na00071k1.pdf [file d3na00071k1.pdf]
